# Supplementary material for: MnO2-coated porous Pt@CeO2 core–shell nanostructures for photoacoustic imaging-guided tri-modal cancer therapy
Source: Royal Society of Chemistry journal article supplement (doi:10.1039/d1nr03246a), 2021-01-01
Supplement: d1nr03246a1.pdf [file d1nr03246a1.pdf]

## Electronic supplementary information

### **MnO<sub>2</sub>-Coated Porous Pt@CeO<sub>2</sub> Core-Shell Nanostructures for Photoacoustic Imaging-Guided Tri-modal Cancer Therapy**

Qing Xu,<sup>‡a</sup> Danyang Li,<sup>‡a</sup> Haijun Zhou,<sup>a</sup> Biaoqi Chen,<sup>b,c</sup> Junlei Wang,<sup>a</sup> Shi-Bin Wang,<sup>b,c</sup>  
Aizheng Chen<sup>b,c</sup> and Nina Jiang<sup>\*a,b,c</sup>

<sup>a</sup> *College of Chemical Engineering, Huaqiao University, Xiamen 361021, China*

<sup>b</sup> *Institute of Biomaterials and Tissue Engineering, Huaqiao University, Xiamen 361021,  
P. R. China*

<sup>c</sup> *Fujian Provincial Key Laboratory of Biochemical Technology (Huaqiao University),  
Xiamen 361021, P. R. China*

<sup>‡</sup> *These authors contributed equally to this work.*

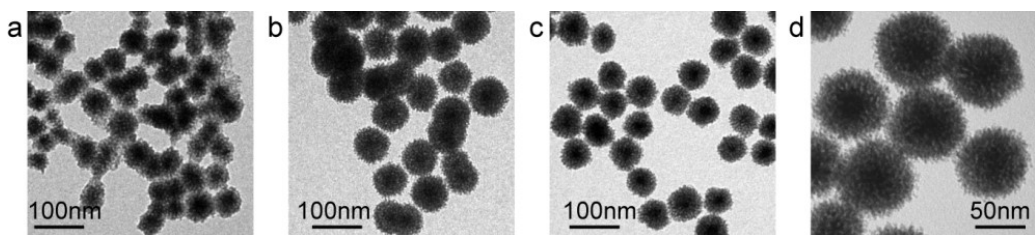

**Fig. S1** Effects of the amount of  $\text{Ce}(\text{NO}_3)_3$  on  $\text{Pt}@\text{CeO}_2$  nanostructures. (a–c) TEM images of  $\text{Pt}@\text{CeO}_2$  nanostructures synthesized with 0.04 mL, 0.1 mL, 0.12 mL of  $\text{Ce}(\text{NO}_3)_3$  (0.04 M), respectively. (d) High-magnification TEM image of  $\text{Pt}@\text{CeO}_2$  nanostructures synthesized with 0.04 mL of  $\text{Ce}(\text{NO}_3)_3$  (0.04 M).

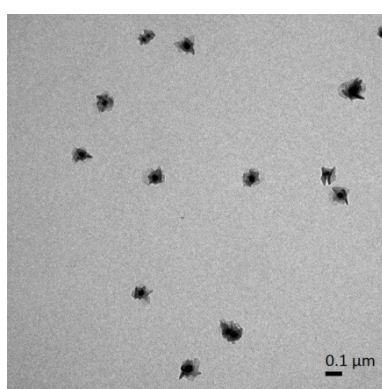

**Fig. S2** Low-magnification TEM image of  $\text{Pt}@\text{CeO}_2@\text{MnO}_2$  nanostructures.

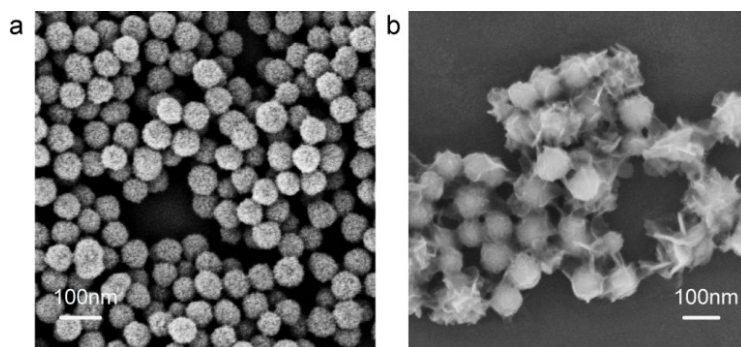

**Fig. S3** SEM images of (a)  $\text{Pt}@\text{CeO}_2$  and (b)  $\text{Pt}@\text{CeO}_2@\text{MnO}_2$  nanostructures.

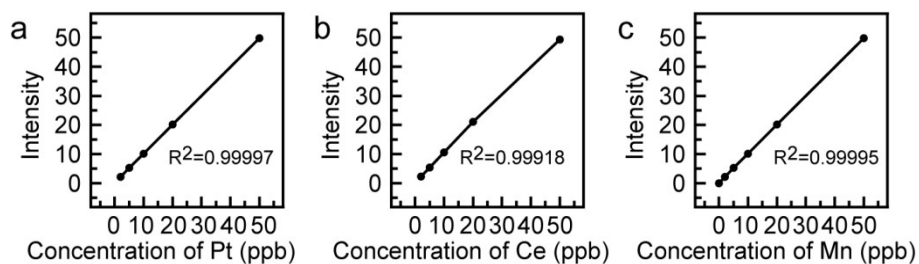

**Fig. S4** Linear calibration relationships between the emission intensity and the atomic mass concentration for (a) Pt, (b) Ce and (c) Mn in the ICP-MS measurements.

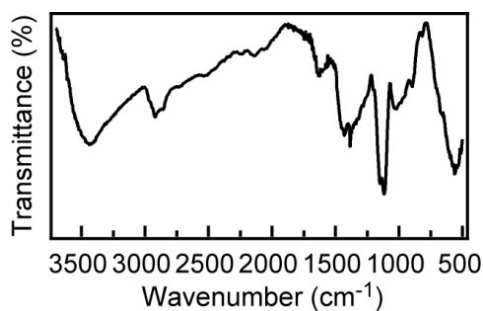

**Fig. S5** Fourier-transform IR (FTIR) spectra of PEG-stabilized Pt@CeO<sub>2</sub>@MnO<sub>2</sub> nanostructures.

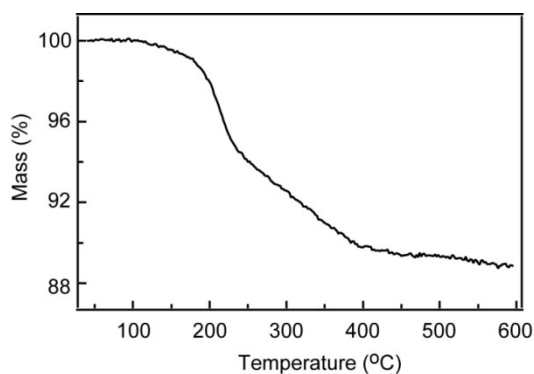

**Fig. S6** Thermogravimetric curve of PEG-stabilized Pt@CeO<sub>2</sub>@MnO<sub>2</sub> nanostructures.

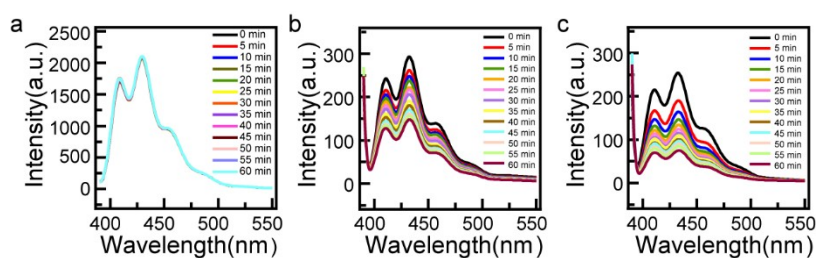

**Fig. S7** Time-dependent fluorescence spectra of ABDA reacting with <sup>1</sup>O<sub>2</sub> produced by (a) Pt NP, (b) Pt@CeO<sub>2</sub> and (c) Pt@CeO<sub>2</sub>@MnO<sub>2</sub> nanostructure samples under 808-nm laser irradiation.

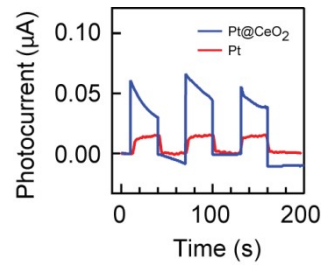

**Fig. S8** Transient photocurrent–time curves for Pt@CeO<sub>2</sub> nanostructures and Pt NPs recorded under the 808-nm laser irradiation.

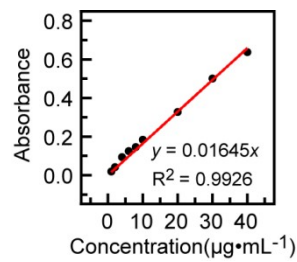

**Fig. S9** Linear calibration relationship between the absorbance at 480 nm and the concentration of doxorubicin (DOX).

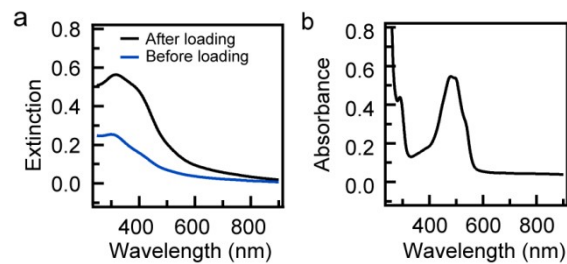

**Fig. S10** (a) Extinction spectra of Pt@CeO<sub>2</sub>@MnO<sub>2</sub> nanostructures before and after DOX loading. (b) Absorption spectra of the aqueous DOX solution.

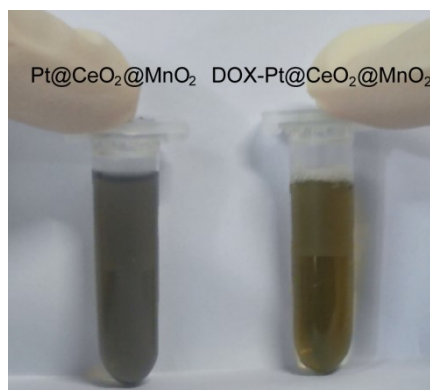

**Fig. S11** Photographs of Pt@CeO<sub>2</sub>@MnO<sub>2</sub> and DOX-Pt@CeO<sub>2</sub>@MnO<sub>2</sub> nanostructure solutions.

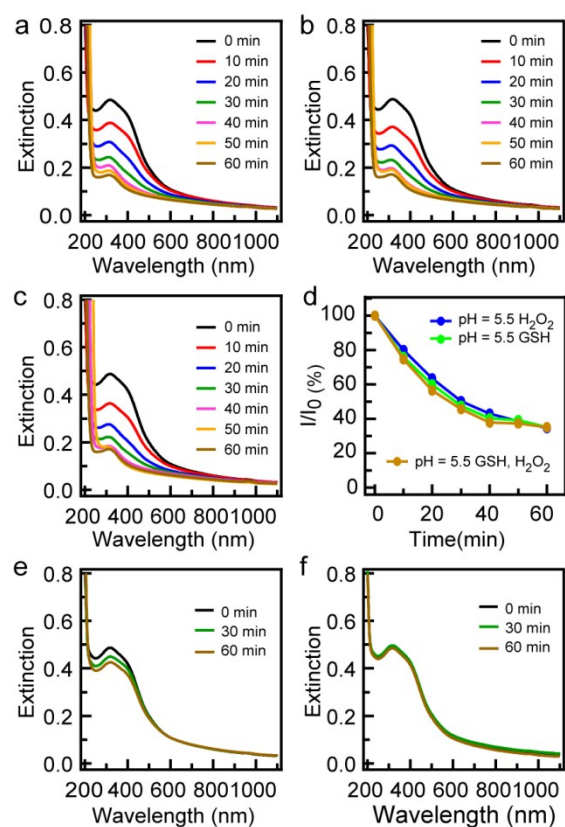

**Fig. S12** Tumor microenvironment (TME)-responsive behaviours of DOX-Pt@CeO<sub>2</sub>@MnO<sub>2</sub> nanostructures. (a–c) Extinction spectra of DOX-Pt@CeO<sub>2</sub>@MnO<sub>2</sub> nanostructures in pH = 5.5 PBS solutions containing (a) H<sub>2</sub>O<sub>2</sub>, (b) glutathione (GSH) and (c) H<sub>2</sub>O<sub>2</sub> and GSH for different times. (d) Variations of the absorption peaks at 314 nm shown in (a–c) with the time. (e, f) Extinction spectra of DOX-Pt@CeO<sub>2</sub>@MnO<sub>2</sub> nanostructures in pH = 7.4 PBS solutions with and without H<sub>2</sub>O<sub>2</sub> and GSH.

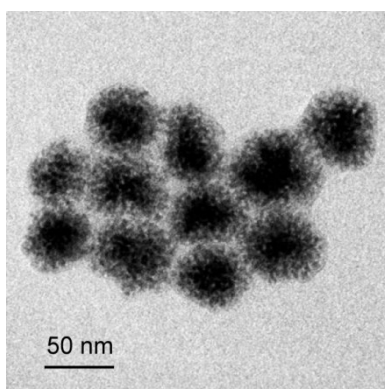

**Fig. S13** TEM images of Pt@CeO<sub>2</sub>@MnO<sub>2</sub> nanostructures treated by PBS solution (pH = 5.5) with GSH and H<sub>2</sub>O<sub>2</sub>.

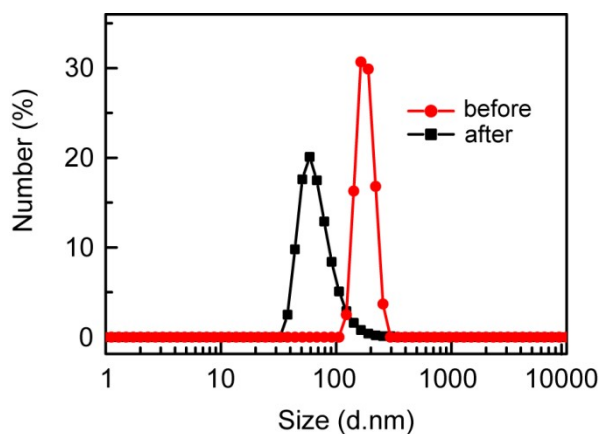

**Fig. S14** Dynamic light scattering data of Pt@CeO<sub>2</sub>@MnO<sub>2</sub> nanostructures before and after treated by pH = 5.5 solution with GSH and H<sub>2</sub>O<sub>2</sub>.

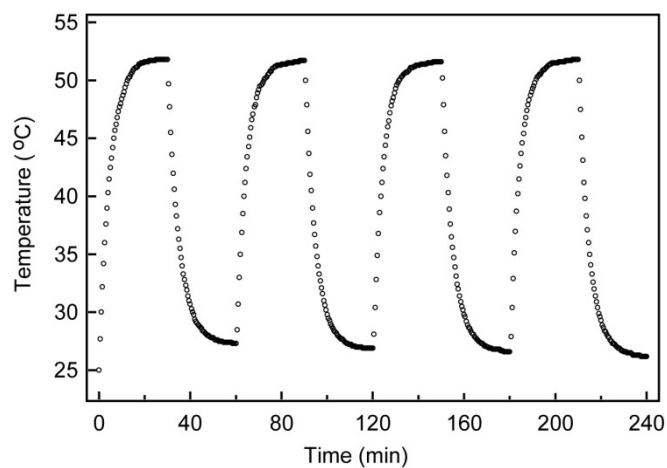

**Fig. S15** Temperature change curves of the DOX-Pt@CeO<sub>2</sub>@MnO<sub>2</sub> nanostructures in water (1 mL, 200  $\mu\text{g mL}^{-1}$ ) with four temperature cycles under an 808-nm laser irradiation at 1 W.

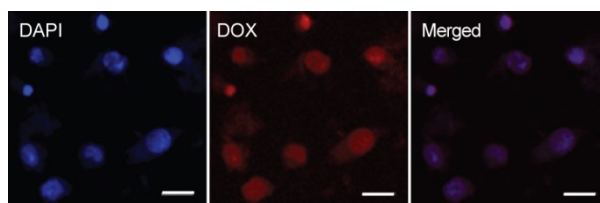

**Fig. S16** Confocal fluorescence microscope images of tumor cells incubated with DOX-Pt@CeO<sub>2</sub>@MnO<sub>2</sub> after 8 h. Scale bar: 20  $\mu\text{m}$ .

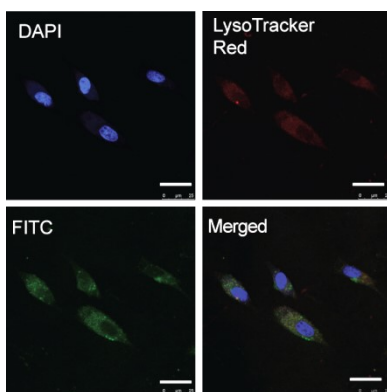

**Fig. S17** Confocal fluorescence microscope images of tumor cells incubated with DOX-Pt@CeO<sub>2</sub>@MnO<sub>2</sub> for 4 h. Scale bar: 25  $\mu$ m.

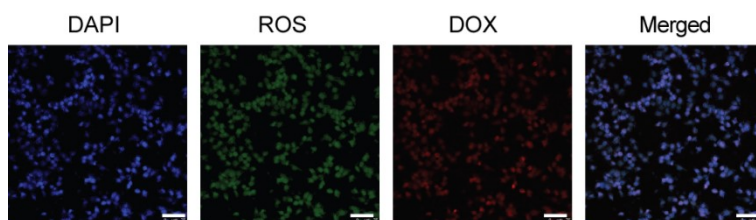

**Fig. S18** Confocal fluorescence microscope images of tumor cells which are incubated with DOX-Pt@CeO<sub>2</sub>@MnO<sub>2</sub> and DCFH-DA probe for 4 h and then treated with 808-nm laser irradiation. Scale bar: 75  $\mu$ m.
